# Supplementary material for: A Highly Stretchable, Tough, Fast Self-Healing Hydrogel Based on Peptide–Metal Ion Coordination
Source: PubMed Central journal article supplement (PMC6632049; doi:10.3390/biomimetics4020036), 2019-05-10
Supplement: biomimetics-04-00036-s001.pdf [file biomimetics-04-00036-s001.pdf]

# A Highly stretchable, tough and fast self-healing hydrogel based on peptide-metal ion coordination

Liang Zeng, Mingming Song, Jie Gu, Zhengyu Xu, Bin Xue, Ying Li and Yi Cao

## Supporting Figures

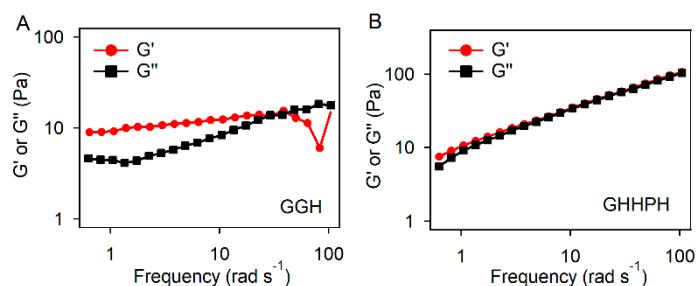

**Figure S1.** Dynamic mechanical properties of GGH and GHHPH Pre-gels without Zn<sup>2+</sup> ion. (A) G' and G'' of the GGH Pre-gels without Zn<sup>2+</sup> measured in frequency sweep experiments (from 0.01 to 100 rad s<sup>-1</sup>, 0.1% strain) at the peptide concentration of 50 mg mL<sup>-1</sup> and the acrylamide concentration of 25 mg mL<sup>-1</sup>. (B) G' and G'' of the GHHPH Pre-gels without Zn<sup>2+</sup> measured in frequency sweep experiments (from 0.01 to 100 rad s<sup>-1</sup>, 0.1% strain) at the peptide concentration of 50 mg mL<sup>-1</sup> and the acrylamide concentration of 25 mg mL<sup>-1</sup>.

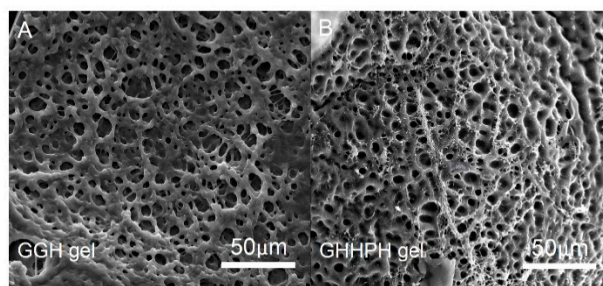

**Figure S2.** SEM images of lyophilized GGH and GHHPH hydrogels. (A) SEM images of lyophilized GGH hydrogels. (B) SEM images of lyophilized GHHPH hydrogels.

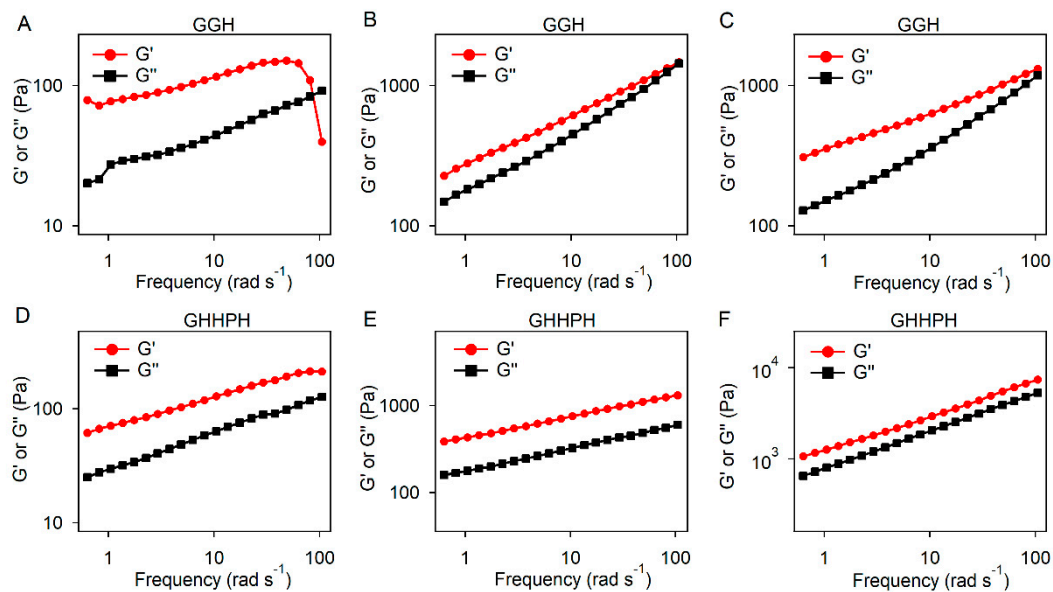

**Figure S3.** Rheological mechanical properties of GGH/GHHPH hydrogels at different concentrations in frequency sweep experiments. (A-C)  $G'$  and  $G''$  of GGH hydrogels measured in frequency sweep experiments (from 0.01 to 100  $\text{rad s}^{-1}$ , 0.1% strain) at peptide concentrations of 25, 50 and 75  $\text{mg mL}^{-1}$  respectively while the concentration of acrylamide was always 25  $\text{mg mL}^{-1}$  and the molar ratio of peptides and  $\text{ZnCl}_2$  was always 15:3. (D-F)  $G'$  and  $G''$  of the hydrogels measured in frequency sweep experiment (from 0.01 to 100  $\text{rad s}^{-1}$ , 0.1% strain) at peptide concentrations of 25, 50 and 75  $\text{mg mL}^{-1}$  respectively while the concentration of acrylamide was always 25  $\text{mg mL}^{-1}$  and the molar ratio of peptides and  $\text{ZnCl}_2$  was always 15:9.

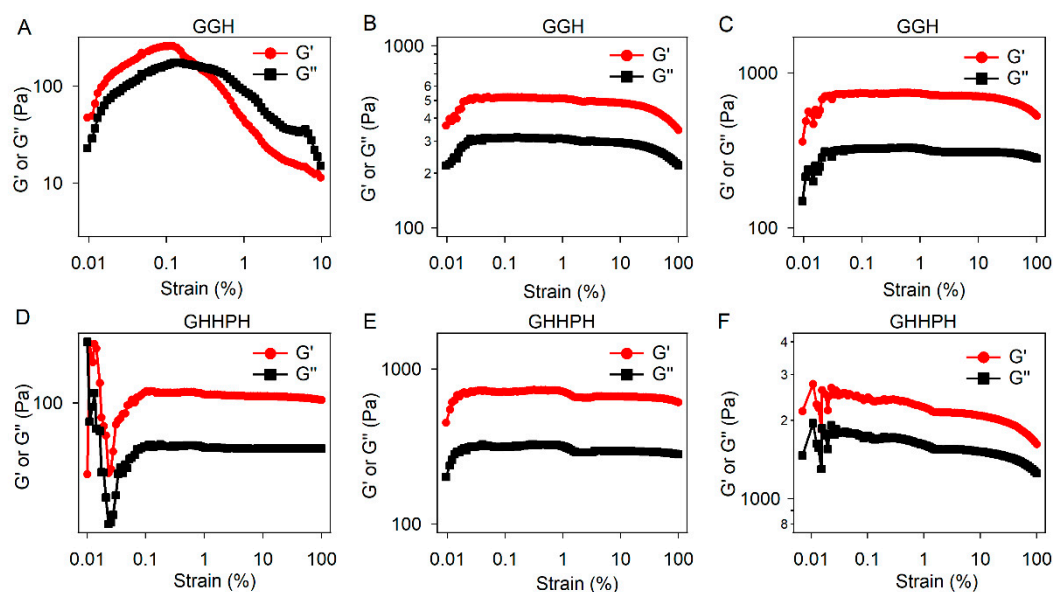

**Figure S4.** Rheological mechanical properties of GGH/GHHPH hydrogels at different concentrations in strain sweep experiments. (A–C)  $G'$  and  $G''$  of GGH hydrogels measured in a strain sweep experiment (from 0.01 to 100 %,  $6.28 \text{ rad s}^{-1}$ ) at the peptide concentrations of 25, 50 and  $75 \text{ mg mL}^{-1}$  respectively while the concentration of acrylamide was always  $25 \text{ mg mL}^{-1}$  and the molar ratio of peptides and  $\text{ZnCl}_2$  was always 15:3. (D–F)  $G'$  and  $G''$  of GHHPH hydrogels measured in a strain sweep experiment (from 0.01 to 100 %,  $6.28 \text{ rad s}^{-1}$ ) at the peptide concentrations of 25, 50 and  $75 \text{ mg mL}^{-1}$  respectively while the concentration of acrylamide was always  $25 \text{ mg mL}^{-1}$  and the molar ratio of peptides and  $\text{ZnCl}_2$  was always 15:9.

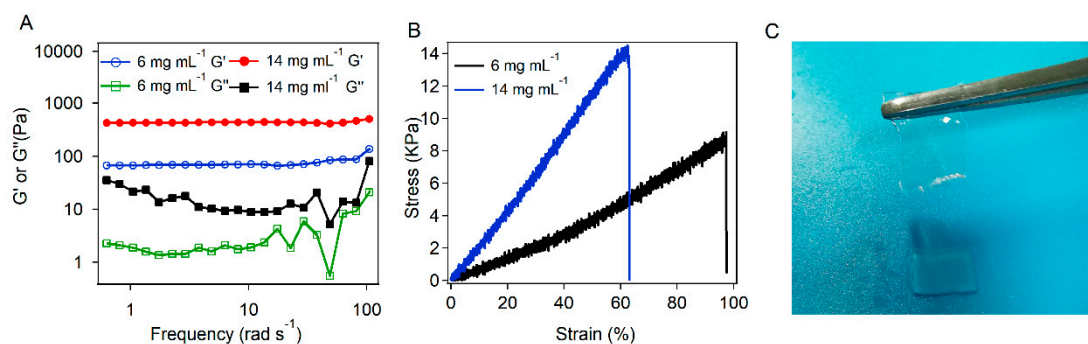

**Figure S5.** Rheological mechanical properties in frequency sweep experiments, and tensile experiments and self-healing properties of the covalent hydrogels. (A)  $G'$  and  $G''$  of the covalent hydrogels measured in a frequency sweep experiment (from 0.01 to  $100 \text{ rad s}^{-1}$ , 0.1% strain) at the bis-acrylamide concentration of 6 and  $14 \text{ mg mL}^{-1}$  while the concentration of acrylamide was always  $25 \text{ mg mL}^{-1}$ . (B) Stress-strain curves of covalent hydrogels at the bis-acrylamide concentration of 6 and  $14 \text{ mg mL}^{-1}$  while the concentration of acrylamide was always  $25 \text{ mg mL}^{-1}$ . (C) The optical image of a covalently cross-linked hydrogel that cannot self-heal after cutting.

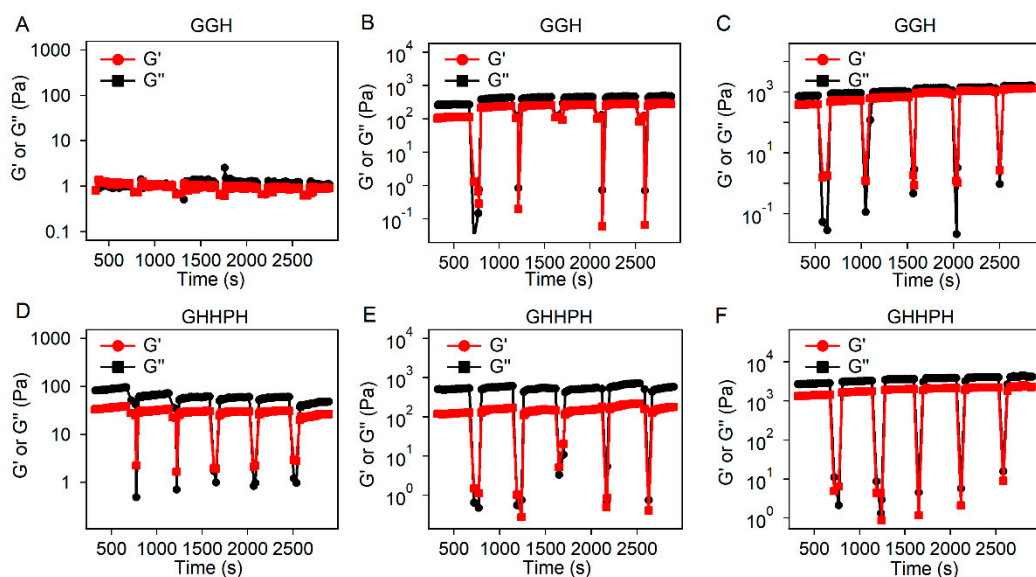

**Figure S6.** Rheological mechanical properties of GGH/GHHPH hydrogels at different concentrations in destroy-recovery experiments. (A–C)  $G'$  and  $G''$  of GGH hydrogels measured in a destroy-recovery experiment at the peptide concentration of 25, 50 and 75 mg mL<sup>-1</sup> respectively while the concentration of acrylamide was always 25 mg mL<sup>-1</sup> and molar ratio of peptides and ZnCl<sub>2</sub> was always 15:3. The strain was set to an amplitude of 1000% to destroy the hydrogels for 60 seconds and switched back to an amplitude of 0.1% to monitor recovery of the mechanical properties for 300 seconds. The  $G'$  and  $G''$  were measured at the frequency of 6.28 rad s<sup>-1</sup> and the strain of 0.1% at 20 °C. (D–F)  $G'$  and  $G''$  of GHHPH hydrogels measured in a destroy-recovery experiment at the peptide concentration of 25, 50 and 75 mg mL<sup>-1</sup> respectively while the concentration of acrylamide was always 25 mg mL<sup>-1</sup> and molar ratio of peptides and ZnCl<sub>2</sub> was always 15:9. The strain was set to an amplitude of 1000% to destroy the hydrogels for 60 seconds and switched back to an amplitude of 0.1% to monitor recovery of the mechanical properties for 300 seconds. The  $G'$  and  $G''$  were measured at a frequency of 6.28 rad s<sup>-1</sup> and the strain of 0.1% at 20 °C.

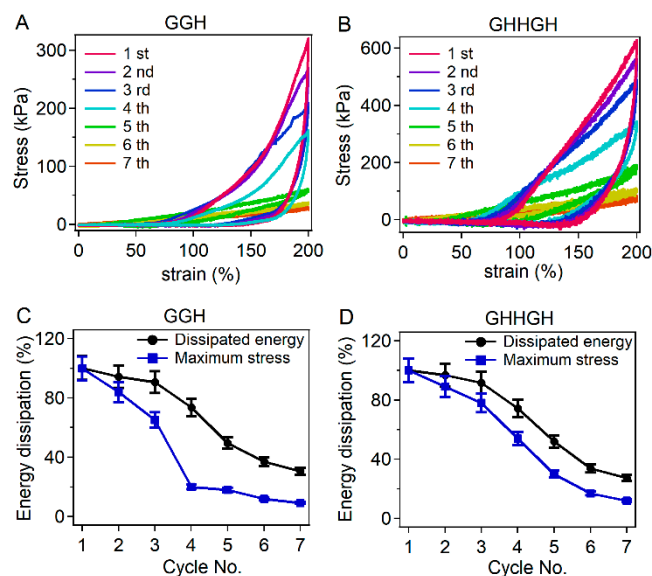

**Figure S7.** Tensile experiments with multiple cyclic loading. (A) Consecutive uniaxial stretching-relaxation cycles of GGH gels without any waiting time at the strain rate of  $30\% \text{ min}^{-1}$ . The concentrations of GGH peptides and acrylamide were  $50 \text{ mg mL}^{-1}$  and  $25 \text{ mg mL}^{-1}$  respectively while the molar ratio of peptides and  $\text{ZnCl}_2$  was always 15:3. (B) Consecutive uniaxial stretching-relaxation cycles of GHHGH gels without any waiting time at the strain rate of  $30\% \text{ min}^{-1}$ . Consecutive uniaxial stretching-relaxation cycles of GGH gels without any waiting time at the strain rate of  $30\% \text{ min}^{-1}$ . The concentrations of GHHGH peptide and acrylamide were  $50 \text{ mg mL}^{-1}$  and  $25 \text{ mg mL}^{-1}$  respectively while the molar ratio of peptides and  $\text{ZnCl}_2$  was always 15:9. (C) The normalized dissipated energy and maximum stress of GGH hydrogel during the multiple cyclic loading. The concentrations of GGH peptide and acrylamide were  $50 \text{ mg mL}^{-1}$  and  $25 \text{ mg mL}^{-1}$  respectively while the molar ratio of peptides and  $\text{ZnCl}_2$  was always 15:3. (D) The normalized dissipated energy and maximum stress of GHHGH hydrogel during the multiple cyclic loading. The concentrations of GHHGH peptides and acrylamide were  $50 \text{ mg mL}^{-1}$  and  $25 \text{ mg mL}^{-1}$  respectively while the molar ratio of peptides and  $\text{ZnCl}_2$  was always 15:9.

**Table S1.** Details of all parameters and formulations in the article.

| <b>Parameter</b> | <b>Definition</b>                              | <b>Formulation</b>                           |
|------------------|------------------------------------------------|----------------------------------------------|
| $L_0$            | The original length of hydrogel in the tension | N/A*                                         |
| $L_b$            | The length of hydrogel at the break point      | N/A                                          |
| $x_0$            | The starting point of tension                  | N/A                                          |
| $x_f$            | The fracture point of the tension              | N/A                                          |
| <b>Load</b>      | The force applied to the specimen              | N/A                                          |
| $s$              | The cross-sectional area of the specimen       | N/A                                          |
| $\sigma$         | The stress during the tension                  | N/A                                          |
| $\epsilon$       | The strain during the tension                  | N/A                                          |
| $W_0$            | The weight of wet hydrogel                     | N/A                                          |
| $W_d$            | The weight of dry hydrogel                     | N/A                                          |
| $W_s$            | Solid content                                  | $W_s = \frac{W_d^{**}}{W_0}$                 |
| $\sigma$         | The stress during the tension                  | $\sigma = \frac{Load^{***}}{s}$              |
| $E_f$            | Toughness                                      | $E_f = \int_{x_0}^{x_f} \sigma(x) dx^{****}$ |

\*N/A is not available.

\*\*  $W_d$  is the weight of the lyophilized hydrogel and  $W_0$  corresponds to the weight of the corresponding wet hydrogel.

\*\*\* *Load* corresponds to force applied to the specimen and  $s$  corresponds to the cross-sectional area of the specimen

\*\*\*\*  $x_0$  corresponds to the starting point of tension,  $x_f$  corresponds to the fracture point of the tension and  $\sigma$  corresponds to the stress during the tension.
